# Supplementary material for: Film thickness-induced optical and electrical modifications in large-area few-layer 2H-MoSe2 grown by MBE
Source: Royal Society of Chemistry journal article supplement (doi:10.1039/d4nr01925c), 2024-01-01
Supplement: d4nr01925c1.pdf [file d4nr01925c1.pdf]

## Supplementary Information

### **Film thickness-induced optical and electrical modifications in large-area few-layer 2H-MoSe<sub>2</sub> grown by MBE**

Santanu Kandar <sup>1</sup>, Kamlesh Bhatt <sup>1</sup>, Nand Kumar <sup>2</sup>, Ashok Kapoor <sup>1</sup>, and Rajendra Singh <sup>1,2,3\*</sup>

<sup>1</sup> Department of Physics, Indian Institute of Technology Delhi, Hauz Khas, New Delhi 110016, India

<sup>2</sup> School of Interdisciplinary Research, Indian Institute of Technology Delhi, Hauz Khas, New Delhi 110016, India

<sup>3</sup> Department of Electrical Engineering, Indian Institute of Technology Delhi, Hauz Khas, New Delhi 110016, India

\*Corresponding author: [rsingh@physics.iitd.ac.in](mailto:rsingh@physics.iitd.ac.in)

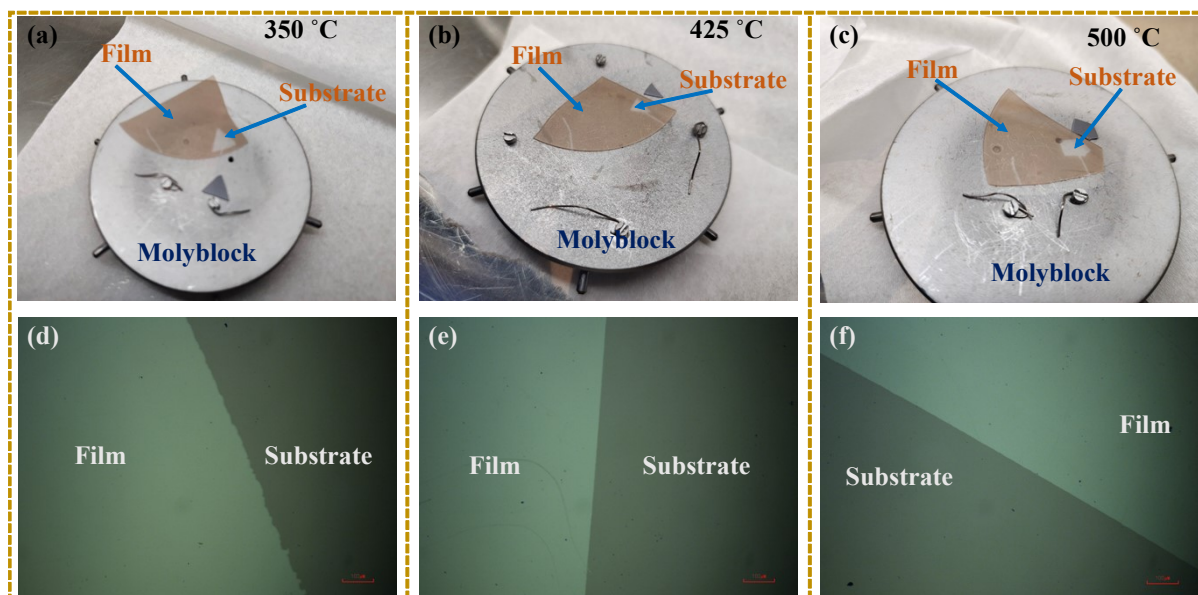

**Fig. S1.** Image of as-grown samples at (a) 350 °C, (b) 425 °C and (c) 500 °C, (d), (e) and (f) are the optical microscope image of the films, clearly showing step between substrate and film.

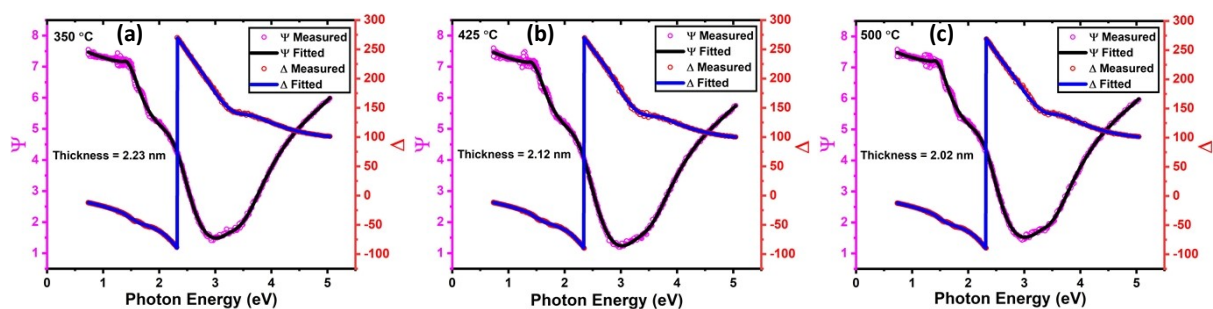

**Fig. S2.**  $\Psi$  and  $\Delta$  fitting of (a) 350 °C, (b) 425 °C, (c) 500 °C grown samples by spectroscopic ellipsometry.

Fig. S2 shows the spectroscopic ellipsometry  $\Psi$  and  $\Delta$  variation and fitting of 350 °C, 425 °C and 500 °C grown samples. The thickness of the 350 °C, 425 °C and 500 °C grown films are 2.23 nm, 2.12 nm, and 2.02 nm, respectively. Slight variations of thickness due to the growth temperature effects.

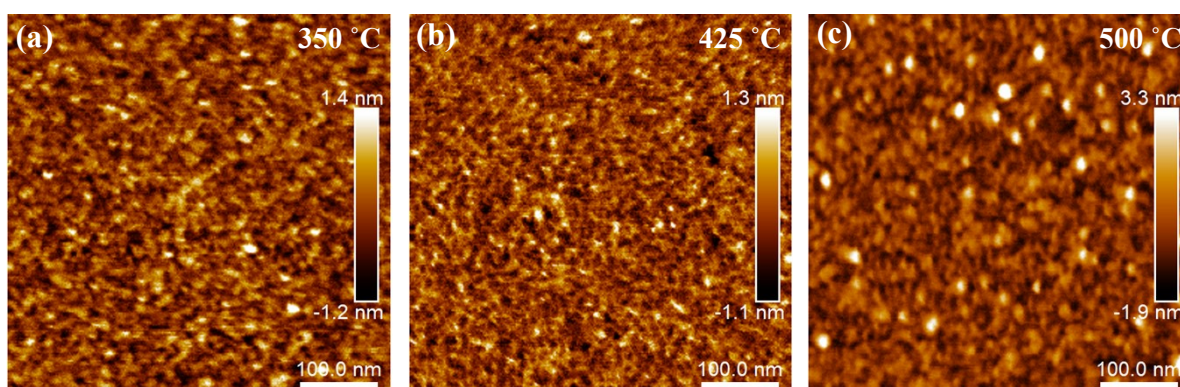

**Fig. S3.** AFM surface topography of (a) 350 °C, (b) 425 °C, and (c) 500 °C grown samples (500 × 500 nm<sup>2</sup> area).

Fig. S3 shows a 500 × 500 nm<sup>2</sup> area AFM image of MoSe<sub>2</sub>, showing small grains of MoSe<sub>2</sub> mostly merged and making a uniform surface.

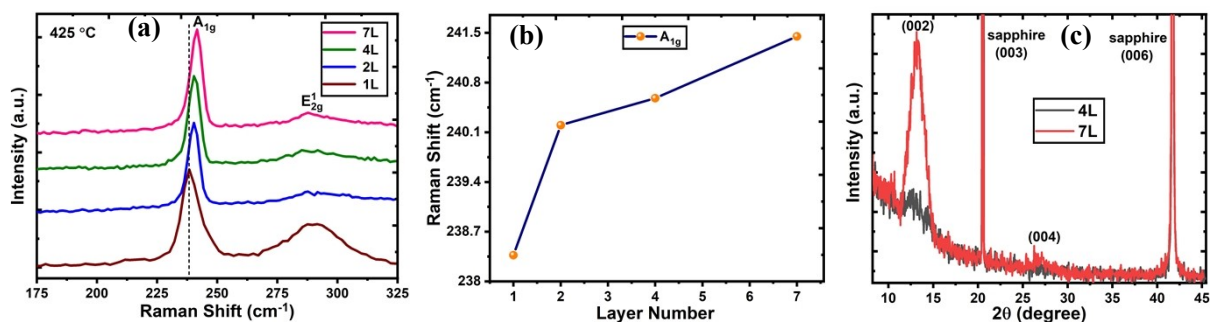

**Fig. S4.** (a) Raman spectroscopy of different thicknesses of MoSe<sub>2</sub> layers, (b) Shift of Raman A<sub>1g</sub> peak position with layer number, (c) XRD of 4L and 7L MoSe<sub>2</sub> films.

Fig. S4 shows the Raman spectroscopy of 1L, 2L, 4L and 7L of MoSe<sub>2</sub> films, there is a redshift of the Raman A<sub>1g</sub> peak position with increasing layer thickness. Raman A<sub>1g</sub> is the out-of-plane vibration mode of MoSe<sub>2</sub>, as the number of layers is added, the A<sub>1g</sub> vibration mode is also affected by that and as a result, there is a redshift in the peak position. We only found XRD for 4L and 7L samples, as 1L and 2L samples are too thin to get any XRD intensity. The XRD peak was found from the (002) family of planes, which indicates out-of-plane van der Waals growth of MoSe<sub>2</sub> films.

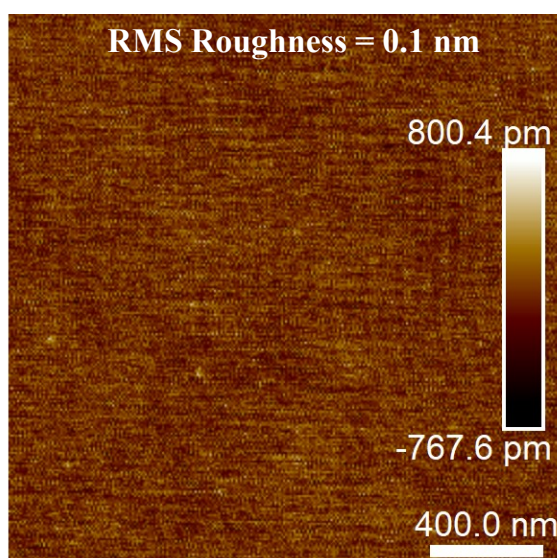

**Fig. S5.** AFM image of the clean sapphire substrate.

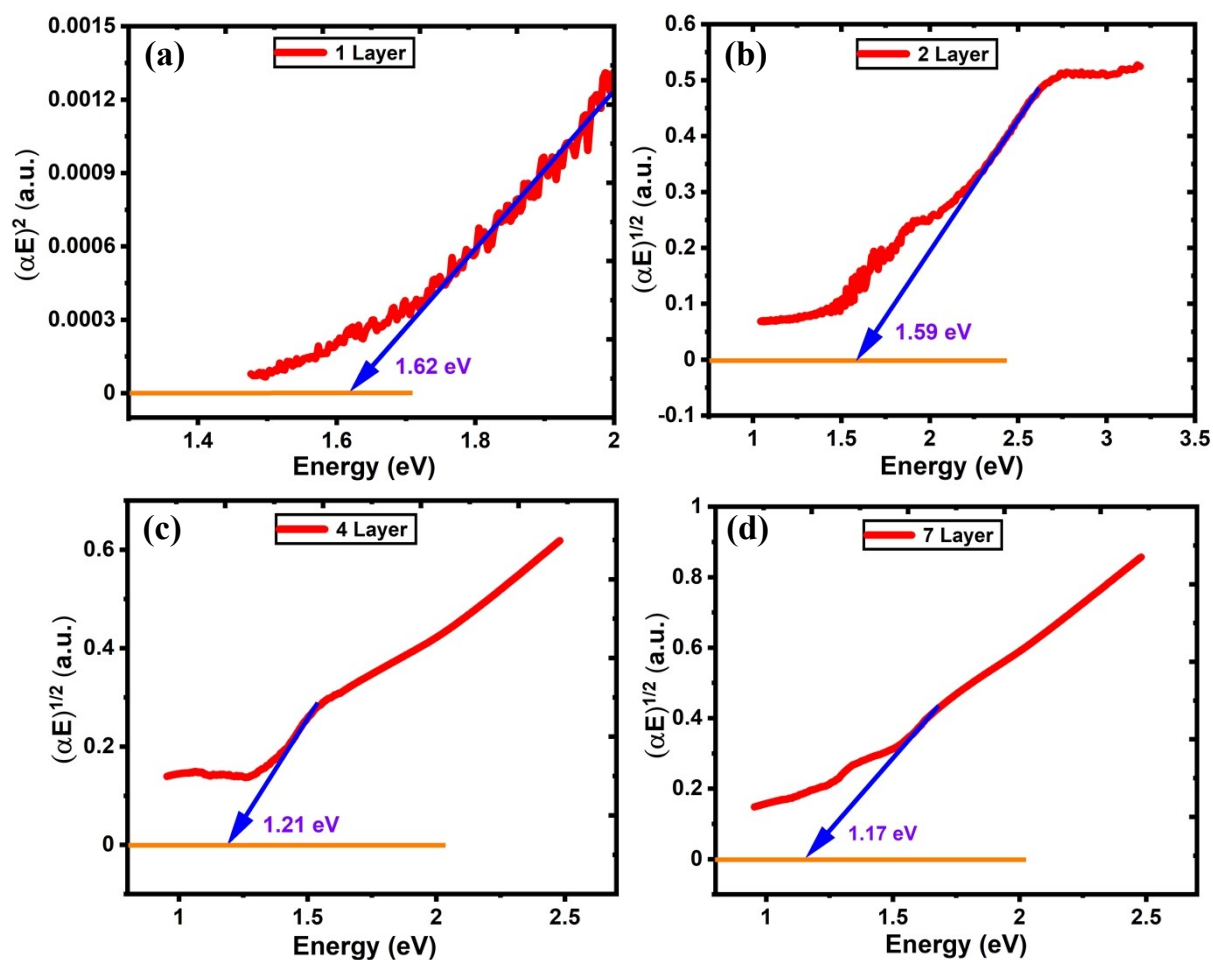

**Fig. S6.** UV-Vis band gap of 1L, 2L, 4L and 7L MoSe<sub>2</sub> films.

### Calculation of lattice constant from XRD:

$2\theta$  value corresponding to the (002) peak is 13.22 degrees.

According to Bragg's law,  $2d \sin\theta = n\lambda$  and  $d = C/\sqrt{(h^2+k^2+l^2)}$ , where C is out of the plane (c-axis) lattice constant.

Now, putting the value of  $h=0$ ,  $k=0$ ,  $l=2$  we get  $d = C/2$ .

By putting  $d = C/2$ , we get

$$C \sin\theta = n\lambda.$$

Now, for (002) peak  $n = 1$ . The value of  $\lambda$  is 1.54 Å for the Cu k-alpha x-ray source.

Putting all these values in the equation, we get

$$C \sin(13.22/2) = 1.54$$

or  $C = 13.3 \text{ \AA}$ .

Therefore, the out-of-plane (c-axis) lattice constant (C) of the MoSe<sub>2</sub> film is 13.3 Å based on the (002) peak.

### **Ellipsometer parameters:**

All the Tauc-Lorentz parameters for 2L, 4L and 7L have been given below.

| Oscillators No. | Tauc-Lorentz Parameters | 2 Layer  | 4 Layer  | 7 Layer  |
|-----------------|-------------------------|----------|----------|----------|
| 1.              | $E_g$ (eV)              | 1.579    | 0.982    | 0.991    |
|                 | $E_0$ (eV)              | 2.585    | 2.386    | 2.305    |
|                 | A                       | 15.1905  | 79.0042  | 57.2263  |
|                 | B                       | 0.710    | 0.943    | 0.575    |
| 2.              | $E_g$ (eV)              | 1.119    | 1.232    | 1.109    |
|                 | $E_0$ (eV)              | 3.381    | 4.346    | 4.296    |
|                 | A                       | 127.8341 | 242.0918 | 352.6824 |
|                 | B                       | 0.863    | 0.861    | 0.860    |
| 3.              | $E_g$ (eV)              | 1.361    | 1.091    | 1.140    |
|                 | $E_0$ (eV)              | 3.413    | 4.381    | 4.395    |
|                 | A                       | 134.0846 | 79.3382  | 128.9343 |
|                 | B                       | 0.460    | 0.669    | 0.684    |
| 4.              | $E_g$ (eV)              | 1.581    | 1.201    | 1.118    |
|                 | $E_0$ (eV)              | 3.845    | 4.789    | 4.978    |
|                 | A                       | 37.5584  | 18.1531  | 52.4017  |
|                 | B                       | 0.556    | 0.534    | 0.408    |
| 5.              | $E_g$ (eV)              | 1.539    | 1.221    | 1.221    |
|                 | $E_0$ (eV)              | 3.102    | 3.531    | 3.650    |
|                 | A                       | 334.5042 | 215.6816 | 218.5192 |
|                 | B                       | 0.468    | 0.459    | 0.464    |
| 6.              | $E_g$ (eV)              | 1.585    | 1.229    | 1.171    |
|                 | $E_0$ (eV)              | 3.396    | 3.607    | 3.898    |
|                 | A                       | 12.4537  | 56.8666  | 77.4226  |
|                 | B                       | 0.437    | 0.676    | 0.633    |

Here,  $E_g$ : Band gap,  $E_0$ : Peak transition energy, **A**: Amplitude parameter, **B**: Broadening term  
1, 2.

All the Lorentz oscillator model parameters for 1L MoSe<sub>2</sub> film have been given below.

| Oscillators No. | Lorentz Oscillator Parameters | 1 Layer   |
|-----------------|-------------------------------|-----------|
| 1.              | $E_n$ (eV)                    | 4.353     |
|                 | A                             | 8.011463  |
|                 | B                             | 5.3143    |
| 2.              | $E_n$ (eV)                    | 3.171     |
|                 | A                             | 37.339463 |
|                 | B                             | 1.2389    |
| 3.              | $E_n$ (eV)                    | 3.205     |
|                 | A                             | 34.346659 |
|                 | B                             | 1.1510    |
| 4.              | $E_n$ (eV)                    | 2.969     |
|                 | A                             | 1.744886  |
|                 | B                             | 0.3943    |
| 5.              | $E_n$ (eV)                    | 2.798     |
|                 | A                             | 0.783280  |
|                 | B                             | 0.2307    |

Here,  $E_n$ : Center energy, **A**: Amplitude parameter, **B**: Broadening term <sup>3</sup>.

### References:

- 1 G. E. Jellison and F. A. Modine, *Appl. Phys. Lett.*, 1996, **69**, 371–373.
- 2 J. Xie, D. Zhang, X. Q. Yan, M. Ren, X. Zhao, F. Liu, R. Sun, X. Li, Z. Li, S. Chen, Z. B. Liu and J. G. Tian, *2D Mater.*, 1998, 313–314, 394–397.
- 3 R. A. Synowicki, *Thin Solid Films*, 1998, **313–314**, 394–397.
